# Supplementary material for: Quantitative Data Integration Analysis Method for Cross-Studies: Obstructive Sleep Apnea as an Example
Source: Comput Math Methods Med. 2022 Jun 7;2022:1977446. doi: 10.1155/2022/1977446 (PMC9197656; doi:10.1155/2022/1977446)
Supplement: Supplementary Materials — The Supplementary Material for this article: Supplementary Table 1: PRISMA 2009 checklist. Supplementary Table 2: search strategies. Supplementary Table 3: research information details and indicator dataset. Supplementary Table 4: specific information of indicators and studies under different profile. Supplementary Table 5: analysis result data. [file 1977446.f1.zip]

Archive with 5 entries (5 files):
- Supplementary Table1.docx
- Supplementary Table2.docx
- Supplementary Table3.xlsx
- Supplementary Table4.xlsx
- Supplementary Table5.xlsx
