# Supplementary material for: Quantitative Data Integration Analysis Method for Cross-Studies: Obstructive Sleep Apnea as an Example
Source: Comput Math Methods Med. 2022 Jun 7;2022:1977446. doi: 10.1155/2022/1977446 (PMC9197656; doi:10.1155/2022/1977446)
Supplement: Supplementary Materials — The Supplementary Material for this article: Supplementary Table 1: PRISMA 2009 checklist. Supplementary Table 2: search strategies. Supplementary Table 3: research information details and indicator dataset. Supplementary Table 4: specific information of indicators and studies under different profile. Supplementary Table 5: analysis result data. [file 1977446.f1.zip › Supplementary Table3.xlsx]

## Sheet: Sheet1
Study	Study Type	IF	DOI	First Author	Yeas	Region	Participants	Sample Size	Control	Case	Age	Male	Female	Study duration	Intervention or mornitoring methods	AHI_Baseline	AHI_Follow up	Sleep apnea time (min/hour)_Baseline	Sleep apnea time (min/hour)_Follow up	Respiratory Disturbance Index (RDI)_Baseline	Respiratory Disturbance Index (RDI)_Follow up	Obstructive-AHI_Baseline	Obstructive-AHI_Follow up	Central-AHI_Baseline	Central-AHI_Follow up	WASO(min)_Baseline	WASO(min)_Follow up	TST(min)_Baseline	TST(min)_Follow up	TST(h)_Baseline	TST(h)_Follow up	Sleep efficiency SE_Baseline	Sleep efficiency SE_Follow up	Sleep duration_Baseline	Sleep duration_Follow up	TIB(Timeinbed)_Baseline	TIB(Timeinbed)_Follow up	Wake(%TST)_Baseline	Wake(%TST)_Follow up	Wake(%TIB)_Baseline	Wake(%TIB)_Follow up	N1(%SPT)_Baseline	N1(%SPT)_Follow up	N2(%SPT)_Baseline	N2(%SPT)_Follow up	N3+N4(%SPT)_Baseline	N3+N4(%SPT)_Follow up	REM(%SPT)_Baseline	REM(%SPT)_Follow up
1	Randomized Controlled Trial	74.699	10.1056 / NEJMoa1308659	Patrick J	2014	America	Patients with obstructive sleep apnea	124	124	124	54.5±10.2	105	19	12M	Respiratory stimulation device implanted	32.0±11.8	15.3±16.1
2	Randomized Controlled Trial	4.805	10.5665/sleep.5054	Patrick J	2015	America	Patients with obstructive sleep apnea	124	124	124	54.5±10.2	105	19	12M	Respiratory stimulation device implanted	32.0(±11.8)	15.3(±16.1)
4	Randomized Controlled Trial	4.805	10.5665/sleep.5054	Patrick J	2015	America	Patients with obstructive sleep apnea	124	124	124	54.5±10.2	105	19	18M	Respiratory stimulation device implanted	32.0(±11.8)	14.1±14.4
4	Clinical Trial	74.699	10.1056 / NEJMoa1215881	Carole L Marcus	2013	America	Patients with obstructive sleep apnea	397	203	194	6.5±1.4	195	202	7M	Adenotonsillectomy
5	Clinical Trial	45.54	10.1001/jama.2020.14265	Stuart MacKay	2020	Australia	Patients with obstructive sleep apnea	102	51	51	44.6（12.8）	84	18	6M	Multistage upper respiratory tract surgery
6	Clinical Trial	8.308	10.1378/chest.14-2973	Sebastian Zaremba	2015	America	Puerpera within 48 hours after delivery	55	30	30	33.13 (5.1)	0	55		Lie on your back and raise your upper body 45 degrees	7.7±2.2	4.5±1.4									59.8（9.4）	58.5(8.0)	110.2（10.9）	117.2(11.7)
7	Clinical Trial	18.652	10.1001/jamainternmed.2015.2051	Marie Marklund	2015	Sweden	Patients with daytime sleepiness and obstructive sleep apnea WITH an AHI<30	91	46	45	49.8 (10.6)/54.1 (9.4)	62	29	4M	Adjustable oral orthodontics treatment													6.6[-8.7，21.8]	12.1[-8.3，32.4]			0.2[-1.4，1.9]	-0.1[-2.9，2.8]
8	Clinical Trial	12.095	10.1016 / s0006-3223（98）00198-x	DJ Buysse	1999		Women with depression	111	49	62	37.3±9.2	0	111	4W	IPT interpersonal psychotherapy																			411（51）	419（50）
9	Randomized Controlled Trial	17.452	10.1164 / rccm.201103-0428OC	Juan F Masa	2011	Spanish	Patients with moderate or high suspicion of SAHS	348	348	348	48.7（11.8）	263	85		Family respiration (HRP)/polysomnography (PSG)	38（29）	31（24）											372（64）	404（71）
10	Clinical Trial	17.452	10.1164/ajrccm.150.2.8049831	D G Davila	1994	America	Non-smokers with a history of snoring	20	10	10	46.9±11.4	10	10	24h	Transdermal nicotine active patches													378±35	345±46			89.7±7.5	83.5±9.5			422±35	414±39
11	Clinical Trial	17.452	10.1164/ajrccm.151.1.7812552	R A O'Sullivan	1995	Australia	Habitual snorer	57	51	51	49.1±11.8	52	5	3.5±2.1M	Mandibular tilt splint treatment	32.2±28.5	17.5±22.7											186.7±31.5	167.6±35.5			80.3±11.2	80.9±11.5
12	Clinical Trial	4.805	10.1093/sleep/zsx184	David W Carley	2018	America	Patients with obstructive sleep apnea	73	25	Experimental group 1:21 experimental group 2:27	Control group: 4.1 ± 5.5;Experimental group 1: −6.6 ± 5.9;Experimental group 2: −8.5 ± 5.2	52	21	6W	The experimental group received Dronabinol and the control group received placebo
14	Clinical Trial	4.805	10.1093/sleep/zsx184	David W Carley	2018	America	Patients with obstructive sleep apnea	73	25	Experimental group 1:21 experimental group 2:27	Control group: 4.1 ± 5.5;Experimental group 1: −6.6 ± 5.9;Experimental group 2: −8.5 ± 5.2	52	21	6W	The experimental group received Dronabinol and the control group received placebo
14	Randomized Controlled Trial	4.805	10.1093/sleep/zsy109	Tiffany J Braley	2018	America	Patients with obstructive sleep apnea	65	21	44	53（45,59）	32	33	4W	The experimental group received DMF (dimethylfumarate) and the control group received placebo					23(14.1，42.4)	29.7(15.6，47.6)
15	Randomized Controlled Trial	4.805	10.1093/sleep/zsy109	Tiffany J Braley	2018	America	Patients with obstructive sleep apnea	25	16	9	62.7 ± 6.9	21	4	2W	Supplemental oxygen during CPAP withdrawal	34.4(22.7，44.4)	30.4(23.6，42.6)
16	Controlled Clinical Trial	3.362	10.1111/aos.13798	Emilie Agard	2018	Franc	Retinal meridians occlusion and non - patients	114	45	69	71.6±11.7/73.8±6.7	50	74
17	Clinical Trial	4.805	10.5665/sleep.6084	Ignacio E Tapia	2016	America	Children with obstructive sleep apnea and normal children	71	32	29	9.5 （7.5，12.6）/11.2（9.3，13.5）	33	28			0.5（0.1，0.7）	11.3（5.7，19.5）
18	Clinical Trial	4.836	10.1513/AnnalsATS.201606-432OC	Leila Kheirandish-Gozal	2016	America	Children with obstructive sleep apnea	28	28	28	5.5 ± 2.5	14	14	16W	Oral montelukast 3 or 4mg/d							9.2 ± 4.1	4.2 ± 2.8					483.5 ± 49.1	478.2 ± 58.1
19	Randomized Controlled Trial	4.805	10.5665/sleep.6226	Bradley A Edwards	2016	Australia	Patients with obstructive sleep apnea	22	11	11	50.9 ± 2.6	12	8	1W	Eszopiclone (eszopiclone) was taken orally with 40% oxygen supplementation at night	49.3±6.2	26.5±4.9											349.2±16.8	381.4±14.5			74.6[64.8–89.9]	84.0[69.5–93.4]
21	Randomized Controlled Trial	5.359	10.1542/peds.2016-3314	Anna Borgström	2017	Sweden	Patients with obstructive sleep apnea	40			47 (15)	29	11	1Y	ATE (value-added adenotonsillectomy)	12.7(8.3，19.1)	2.0(1.2，3.1)					10.3(6.7，17.3)	0.8(0.3，1.8)
21	Randomized Controlled Trial	5.359	10.1542/peds.2016-3314	Anna Borgström	2017	Sweden	Patients with obstructive sleep apnea	39			45 (15)	24	15	1Y	ATE (value-added adenotonsillectomy)	15.8(8.5，21.2)	4.0(1.2，5.1)					13.9(6.0，19.8)	1.2(0.6，2.5)
22	Randomized Controlled Trial	4.805	10.1093/sleep/zsw047	Luigi Taranto-Montemurro	2017	Australia	Patients with obstructive sleep apnea	14	14	14	58 [12]	8	6	1W	Tiagabine 12mg orally											97.0[50.7]	89.0[44.4]	426[55]	422[61]			69.6[14.9]	74.6[15.3]
23	Randomized Controlled Trial	4.805	10.1093/sleep/zsx047	Simon A Joosten	2017	Australia	Patients with obesity + obstructive sleep apnea	37	37	37	47.7 (41.9, 52.8)	21	16	6M	CPAP and lose weight	52.4(34.7，79.5)	27.7(13.1，50.9)															83±3	90±2
24	Randomized Controlled Trial	4.805	10.5665/sleep.5622	Sophie G Carter	2016	Australia	Patients with obstructive sleep apnea	12	12	12	49 ± 3	9	3		Zopiclone 7mg orally before bedtime																	83±3	90±2	6±1	8±2
25	Randomized Controlled Trial	8.308	10.1016/j.chest.2016.02.647	Juan F Masa	2016	Spanish	Patients with Obesity hypoventilation syndrome	302			61.7 (12.3)	115	187			25.1(21.2)	25.1(21.2)
26	Randomized Controlled Trial	8.308	10.1016/j.chest.2016.02.647	Juan F Masa	2016	Spanish	Patients with Obesity hypoventilation syndrome	302			61.7 (12.3)	115	187			25.1(21.2)	89.9(23.0)
27	Randomized Controlled Trial	4.796	10.3238/arztebl.2016.0001	Ulrich J Sommer	2016	Germany	Patients with obstructive sleep apnea +CAPA intolerance + oropharyngeal obstruction	42	19	23	37.2±10.7	40	2	3M	Tonsillectomy vs. hysterectomy (TE-UPPP)	28.6±19.3	15.4±14.1			28.7±19.4	21.8±21.8
28	Randomized Controlled Trial	17.452	10.1164/rccm.201511-2172OC	Luigi Taranto-Montemurro	2015	Australia	Healthy subjects	10	10	10	27.5 (24.0，39.5)	4	6		Dixipramine is taken at night	0.0(0，0)	0.0(0，0)											292.5(260.3，347.0)	320.5(278.3–366.5)			64.8(58.9，78.9)	78.1(68.5–84.9)
29	Clinical Trial	23.603	10.1161/CIRCULATIONAHA.115.019392	Chi-Hang Lee	2016	China	OSA patients	1311	717	594	58.2±10.2	1117	194			5.9(7.1)	28.9(21.1)
30	Randomized Controlled Trial	17.452	10.1164/rccm.201601-0099OC	Bradley A Edwards	2016	Australia	Patients with obstructive sleep apnea	14	14	14	51.8 ± 2.3	11	3		Oral device	29.6 ± 5.3	29.6 ± 5.3											340.7 ± 13.9	340.7 ± 13.9			80.7(65.4，97.1)	80.7(65.4，97.1)			424.1 ± 14.3	424.1 ± 14.3
31	Randomized Controlled Trial	4.805	10.5665/sleep.3932	Arnoldo Guerrero	2014	Spanish	Patients with obstructive sleep apnea	56	29	27	53.7±10.7	31	25	3D	3 nights of portable sleep monitoring (PM) VS PSG	29.6± 22.4	23.4± 4.4																	380.2± 66.0	401.9± 59.6
32	Randomized Controlled Trial	17.452	10.1164/rccm.201406-1092OC	Carole L Marcus	2014	America	Premature babies	201	103	98	9.1±1.9/9.3±2.1	115	86	6W	Caffeine and placebo during the neonatal period													493.3(3.4)	488.3(3.7)					614.3(3.8)	614.3(4.0)	566.0(3.9)	564.3(4.1)
33	Randomized Controlled Trial	17.452	10.1164/rccm.201406-1092OC	Carole L Marcus	2014	America	Premature babies	201	103	98	9.1±1.9/9.3±2.1	115	86	6W	Caffeine and placebo during the neonatal period							0.3(0.1，0.8)	0.3(0.1，0.6)					531.9(63.5)	551.0(52.7)			91.8(4.4)	91.8(4.9)
34	Randomized Controlled Trial	17.452	10.1164/rccm.201406-1092OC	Carole L Marcus	2014	America	Premature babies	201	103	98	9.1±1.9/9.3±2.1	115	86	6W	Caffeine and placebo during the neonatal period
35	Clinical Trial	3.412	10.1007/s11695-014-1510-9	Jianyin Zou	2015	China	Obesity + type 2 diabetes +AHI>5	44	44	44	48 ± 11	18	26	6M	LYGB(Laparoscopic gastric bypass surgery)	22.4(17.8)	7.1(9.4)
36	Randomized Controlled Trial	4.836	10.1513/AnnalsATS.201408-399OC	Erik T Smales	2015	America	Patients with obstructive sleep apnea (AHI>10/h)	13	13	13	52 ± 3	7	6	1W	100mg trazodone with placebo	38.7 ± 6.2	28.5 ± 5.6											379.4 ± 18.3	379.4 ± 18.3			80.6 ± 3.8	81.4 ± 4.0
37	Randomized Controlled Trial	4.805	10.5665/sleep.3220	Gaétane Deliens	2013	Belgium	Healthy subjects	25			26.2±4.7	11	14	1W	Taking a nap																			406.90±38.52	335.4±26.06
38	Randomized Controlled Trial	4.805	10.5665/sleep.3220	Gaétane Deliens	2013	Belgium	Healthy subjects	25			26.2±4.7	11	14	1W	Taking a nap																			406.90±38.52	338.9±28.97
39	Randomized Controlled Trial	4.805	10.5665/sleep.6080	Tsogyal Daniela Latshang	2016	Switzerland	Patients with obstructive sleep apnea	39	39	39	64（56,66）	36	3		They received placebo and acetamide for 2 days at altitude of 1860m	63.6（47.9，87.4）	49.1（26.0，62.4）
40	Randomized Controlled Trial	4.805	10.5665/sleep.6080	Tsogyal Daniela Latshang	2016	Switzerland	Patients with obstructive sleep apnea	39	39	39	64（56,66）	36	3		At 2590m, patients received placebo and acetamide for 1 day	86.2（65.9，105.8）	57.8（49.2，83.8）
41	Randomized Controlled Trial	17.452	10.1164/rccm.201609-1817OC	Frédéric Gagnadoux	2017	Franc	OSA patients without Cardiovascular disease	150	75	75	53.8 (10.2)	129	21	2M	Effective mandibular displacement device and sham device were used	38.0(23.0，51.0)	18.5(11.5，26.0)											378.2(67.2)	396.5(64.2)
42	Randomized Controlled Trial	7.067	10.1097/ALN.0b013e318297d89a	Pu Liao	2013	Canada	Patients with obstructive sleep apnea	106	66	40	59±11/53±9	58	48	8N	Automatic titration continuous positive airway pressure therapy was performed	31.9（13.5，50.2）	3.0（1.0，12.5）
43	Randomized Controlled Trial	4.805	10.5665/sleep.3662	Timothy I Morgenthaler	2014	America	People with sleep apnea syndrome (CompSAS)	66	33	33	59.1±14.2/59.4±11.7	56	10	90D	Receiving adaptive servo ventilation (ASV) and continuous positive airway pressure (CPAP)	9.9±11.1	4.4±9.6											373.1±65.5	363.5±55.9			80.7±13.4	80.5±10.1
44	Clinical Trial	4.805	10.5665/sleep.3596	Danny J Eckert	2014	America	OSA patients with low respiratory arousal threshold	7	7	7	45±3	6	1	3M	Take 100mg trazodone orally before bedtime	39±12	39±11															78±5	76±6
45	Randomized Controlled Trial	5.359	10.1542/peds.2012-0310	Aviv D Goldbart	2012	Israel	Children without severe OSA	46	23	23	4.8±2.0/4.7±2.3	27	19	12W	Oral montelukast 4 or 5mg/d							6.1±3.4	3.6±2.3							6.37±0.33	6.46±0.26	89.6±5.6	87.0±4.9					4.1±1.2	3.6±1.0
46	Randomized Controlled Trial	17.452	10.1164/rccm.201212-2223OC	Craig L Phillips	2013	Australia	Patients with obstructive sleep apnea	126	126	126	49.5±11.2	102	24	1M	CPAP and MAD (Mandibular Advance Device)	4.5±6.6	11.2±12.1															82±12	82±12
47	Randomized Controlled Trial	4.805	10.5665/sleep.2878	Dominic Dellweg	2013	Germany	People with sleep apnea syndrome (CompSAS)	30	30	30	64±11	21	9	6W	CPAP	42.9±14.9	28.1±8.1					32.1±15.7	10.7±5.7					291±61	245±85.6			70.8±13.8	62.3±21.7
48	Randomized Controlled Trial	4.805	10.5665/sleep.2878	Dominic Dellweg	2013	Germany	People with sleep apnea syndrome (CompSAS)	30	15	15	64±11	21	9	12W	After receiving CPAP treatment for 6M, they received NPPV and SVfor 6 months respectively	16.5±8	7.4±4.2					6.3±4.1	5.9±3.1					277±82	277±10.3			68.4±21	64.4±20.4
49	Randomized Controlled Trial	4.805	10.1093/sleep/34.4.479	Richard B Berry	2011	America	Patients with obstructive sleep apnea (AHI>10/h)	173	81	92	49.0±13.1/47.3±12.3	121	52	1W	Receiving EPAP (airway device) versus receiving placebo device	13.6 (8.6，25.8)	7.1(2.2，17.1)									58.8±37.8	54.0±36.8	344.4±66.2	352.4±65.1
50	Randomized Controlled Trial	17.452	10.1164/rccm.201106-0964OC	Malcolm Kohler	2011	Switzerland	OSA patients	41	21	20	63.6±5.1/61.8±7.5	40	1	2W	CPAP versus placebo CPAP	33.8±24.3	0.4±2.8											20.3±116.2	27.7±98.7
51	Clinical Trial	4.805	10.5665/sleep.1380	Peter R Eastwood	2011	Australia	OSA patients intolerance CPAP	21	21	21	53.6 ± 9.2	14	7	3M	Implanted nerve stimulators	43.1±17.5	19.0±10.7											340.5±64.0	363.0±65.7			76.6±11.3	82.5±12.5
52	Clinical Trial	4.805	10.5665/sleep.1380	Peter R Eastwood	2011	Australia	OSA patients intolerance CPAP	21	21	21	53.6 ± 9.2	14	7	6M	Implanted nerve stimulators	43.1±17.5	19.5±16.7											340.5±64.0	349.5±57.7			76.6±11.3	81.7±11.6
53	Randomized Controlled Trial	4.805	10.5665/sleep.1422	Christopher E Kline	2011	America	Patients with obstructive sleep apnea (AHI ≥ 15)	43	16	27	46.9±1.2	24	19	12W	Exercise training therapy											66.1±12.7	63.7±7.7	400.3±13.6	406.5±8.7			83.4±2.8	84.7±1.8
54	Randomized Controlled Trial	4.805	10.5665/sleep.1438	Shahrokh Javaheri	2011	America	Patients with sleep disordered breathing (SDB) (AHI ≥ 15)	37	37	37	63 ± 11	32	5	4N	Advanced adaptive servo ventilator and traditional adaptive servo ventilator	10±10	6±6															77±13	76±12
55	Clinical Trial	17.452	10.1164/rccm.201112-2167OC	Carole L Marcus	2012	America	Children with obstructive sleep apnea symptoms obstructive sleep apnea syndrome	52	52	52	12± 4	36	16	3M	CPAP	18.1±14.7	2±2.3															82±11	83±18
56	Randomized Controlled Trial	4.805	10.5665/sleep.1736	Fredrik Valham	2012	Sweden	Patients with obstructive sleep apnea (AHI 10-30)	40	40	40	59.6±9.4	25	15	3N	Effects of 16 and 24 degrees Celsius on OSA sleep	27±18	31±18					24±17	30±17			99±63	84±56	397±70	428±62			71±13	77±11			558±36	558±36
57	Randomized Controlled Trial	4.805	10.5665/sleep.1736	Fredrik Valham	2012	Sweden	Patients with obstructive sleep apnea (AHI 10-30)	40	40	40	59.6±9.4	25	15	3N	Effects of 20 and 24 degrees Celsius on OSA sleep	27±18	29±18					24±17	28±17			99±63	84±52	397±70	420±66			71±13	75±11			558±36	561±36
58	Clinical Trial	4.805	10.1093/sleep/33.6.793	Raffaele Ferri	2010	Italy	Restless Legs Syndrome (RLS)	34	15	19	55.5±11.88	11	23		Oral pramoxole (0.25mg) and placebo													353.7±81.39	415.7±62.51			75.3±12.20	79.4±9.28	444.9±94.95	498.6±49.69	474.4±98.64	523.2±45.69
59	Randomized Controlled Trial	4.732	10.1016/j.psyneuen.2008.05.013	P Schüssler	2008	Germany	Postmenopausal women	10	10	10	60.3 ± 5.7	0	10	5W	Oral dose of 300 mg microprogesterone with placebo													371.1 ± 15.53	407.05 ± 8.77					7.28 ± 1.09	7.13 ± 0.73
60	Randomized Controlled Trial	17.452	10.1164/rccm.200805-669OC	Henri P I Tuomilehto	2009	Finland	Patients with obesity + obstructive sleep apnea	72	37	35	51.8 ± 9.0/50.9±8.6	53	19	1Y	Low calorie intake strategies versus normal lifestyle	0.3±8.0	−4.0±5.6
61	Randomized Controlled Trial	4.805	PMID=19189783	Pimon Ruttanaumpawan	2009	Canada	Patients with heart failure + central sleep apnea (CSA)	205	108	97	62.2 ± 9.3/63.5 ± 10.0	196	9	3M	CPAP and control group received normal heart failure treatment	37.6±25.7	17.6±16.3					6.9±10.7	1.6±3.9	30.7±23.6	16.1±16.3	114.8±70.0	105.7±65.5	308.9±77.6	318.0±73.9			67.8±16.6	70.2±15.7	423.7±55.9	423.7±48.7	457.5±48.9	454.5±44.9
62	Randomized Controlled Trial	17.452	10.1164/rccm.200806-981OC	Kátia C Guimarães	2009	Brasil	Patients with obstructive sleep apnea symptoms obstructive sleep apnea syndrome	31	15	16	51.5 ± 6.8/47.7 ± 9.8	21	10	3M	Oropharyngeal training and placebo training	9.6±6.0	3.3±3.2															87±11	86±9
63	Randomized Controlled Trial	4.805	10.1093/sleep/32.5.648	Sheryn A Deane	2009	Australia	Patients with obstructive sleep apnea (AHI >10)	27	27	27	49.4 ± 11.0	20	7	1M	New tongue stabilizer and mandibular anterior splint	12±9	13±11											347±77	320±97			78±17	79±11
64	Randomized Controlled Trial	4.805	10.1093/sleep/30.1.35	David W Carley	2007	America	Patients with obstructive sleep apnea	12	12	12	18-67	7	5	1W	4.5 mg mirtazapine placebo	22.3±4.8	13.5±3.7															82.9±6.4	87.7±4.9
65	Randomized Controlled Trial	4.805	10.1093/sleep/30.1.35	David W Carley	2007	America	Patients with obstructive sleep apnea	12	12	12	18-67	7	5	1W	15 mg mirtazapine placebo	22.3±4.8	11.4±3.6															82.9±6.4	90.1±3.4
66	Randomized Controlled Trial	4.805	10.1093/sleep/30.4.468	Timothy I Morgenthaler	2007	America	Patients with sleep disorders	21	21	21	65±12.4	20	1	3M	Adaptive servo ventilation and non-invasive positive pressure ventilation	6.2±7.6	0.8±2.4											344.7±59.2	336.8±43.5-			79.7±9.2	81±7.6
67	Clinical Trial	23.603	10.1161/CIRCULATIONAHA.107.696823	David Gozal	2007	America	Children with obstructive sleep apnea	26	26	26	6.9±0.6	16	10	6M	Value-added adenotonsillectomy	11.9±2.2	1.9±0.7															89.9±6.2	90.60.7±6.1
68	Randomized Controlled Trial	4.732	10.1016/j.psyneuen.2008.01.008	Michael Kluge	2008	Germany	Healthy adult male	10	10	10	25.7±3.0	10	0	1N	Ghrelin and placebo																	92.2(1.8)	93.3(1.1)	474.3(4.4)	478.1(5.2)
69	Randomized Controlled Trial	5.359	10.1542/peds.2007-3398	Leila Kheirandish-Gozal	2008	America	Children with obstructive sleep apnea	62	32	48	8.0±0.3/8.1±0.4	46	34	6W	Intranasal budesonide versus placebo (normal saline)							3.7±0.3	1.3±0.2									89.5±1.8	89.9±1.1
70	Clinical Trial	17.452	10.1164/rccm.200507-1035OC	Shahrokh Javaheri	2006	America	Male patients with stable systolic heart failure	12	12	12	66 ± 6	12	0		Acetazolamide and placebo before bedtime	57±28	34±20					1±2	2±5	49±28	23±21
71	Clinical Trial	4.691	10.1016/j.expneurol.2005.10.013	Orla P Hornung	2006	Germany	Healthy elderly	42	20	22	65.5 ± 4/65.4 ± 4	24	18		Donepezil 5mg orally and placebo before bedtime													398.0±36.3	389.5±48.			83.2±7.	81.1±9.	449.3±19.5	446.6±26.4
72	Randomized Controlled Trial	4.805	10.1093/sleep/29.9.1197	Christoph Melzer	2006	Germany	Patients with sleep apnea or hypopnea	19	19	19	68.8 ± 11.4	16	3	3W	Nocturnal overspeed pacing and placebo	26.8±17.1	23.0±16.7					10.7±16.7	8.8±12.9	3.0±3.2	3.6±5.3			349±62	339±76			75±13	76±14
73	Clinical Trial	8.77	10.1212/wnl.61.10.1418	M L Fantini	2003	Canada	People with RBD (REM sleep behavior Disorder)	8	8	8	66±6.8	5	3	8.3±5.1Y	Praxol is taken orally before bedtime													390.5±43.5	390.4±65.0
74	Clinical Trial	4.805	10.1093/sleep/26.7.864	Peter C Gay	2003	America	Participants are suspicious of obstructive sleep apnea symptoms	27	15	12	45.1±9.3/43.6±13.4	22	5	1M	Bipolar pressure system with CPAP	7.6±11.9	3.7±4.4											115.2±36.9	89.6±42.5			73.4±15.0	84.4±14.4
75	Clinical Trial	4.805	10.1093/sleep/27.2.254	Winfried J Randerath	2004	Germany	Patients with obstructive sleep apnea (AHI 10-40)	67	34	33	50.8 ± 12.1/53.3 ± 11.3	44	23	8M	Tongue muscle training was compared with placebo	27.9±9.9	25.3±16.6									28.3±27.4	35.9±45.2	336.2±41.4	326.4±44.6
76	Clinical Trial	8.308	10.1378/chest.125.5.1761	Bernard Fleury	2004	Franc	Patients with obstructive sleep apnea	40	40	40	57±9			2W	Mandibular forward titration (OA)	42±18	5±3															73±16	83±7
77	Clinical Trial	17.452	10.1164/rccm.200401-019OC	Craig A Hukins	2005	Australia	Patients with obstructive sleep apnea symptoms who met CPAP requirements	93	41	53	47.6 ± 12.1/50.0 ± 10.2	61	32	6M	Arbitrary pressure CPAP versus study determined pressure CPAP					2.0 ± 2.1	1.9 ± 3.1											72.2 ± 18.0	81.8 ± 10.1
78	Clinical Trial	17.452	10.1164/rccm.200203-208OC	Helen Gotsopoulos	2002	Australia	Patients with obstructive sleep apnea (RDI≥10/h)	73	73	73	48 ± 11	59	14	9W	Mandibular anterior splint was compared with placebo					86 ± 1	89 ± 1							366 ± 7	370 ± 7			82 ± 2	84 ± 1
79	Clinical Trial	17.452	10.1164/rccm.200204-342OC	Andrew J Pitsis	2002	Australia	Patients with obstructive sleep apnea (AHI >5/h)	23	23	23	50 ± 10	20	3	5W	Mandibular anterior splint has a 4mm opening gap	21 ± 2	8 ± 1											334 ± 12	363 ± 13			79 ± 1	84 ± 2
80	Clinical Trial	17.452	10.1164/rccm.200204-342OC	Andrew J Pitsis	2002	Australia	Patients with obstructive sleep apnea (AHI >5/h)	23	23	23	50 ± 10	20	3	5W	Mandibular anterior splint 14mm open space	21 ± 2	10 ± 2											334 ± 12	361 ± 12			79 ± 1	84 ± 3
81	Clinical Trial	17.452	10.1164/rccm.2108050	Kathleen A Ferguson	2003	Canada	Patients with obstructive sleep apnea (AHI 10-25)	21	21	21	44.6 ± 8.1			8.2 ± 2.7 M	Laser-assisted lamination (LAUP)	18.6 ± 4.3	14.7 ± 7.5
82	Clinical Trial	17.452	10.1164/ajrccm.162.1.9908112	K E Bloch	2000	Switzerland	Patients with obstructive sleep apnea (AHI ≥5/h)	24	24	24	50.6 ± 1.5			3W	Two-piece side Herbst unit	22.6 ± 3.1	8.7 ± 1.5											392 ± 10	390 ± 8			89 ± 2	89 ± 1
83	Clinical Trial	17.452	10.1164/ajrccm.162.1.9908112	K E Bloch	2000	Switzerland	Patients with obstructive sleep apnea symptoms	24	24	24	50.6 ± 1.5			3W	Single-piece mandibular moving device	22.6 ± 3.1	7.9 ± 1.6											392 ± 10	390 ± 11			89 ± 2	88 ± 2
84	Randomized Controlled Trial	4.805	10.5665/sleep.2948	Michiel H J Doff	2013	Holland	Patients with obstructive sleep apnea (AHI ≥6/h)	103	52	51	49±3/43±8	92	11	2M	Oral appliance therapy and CPAP	0（0，3）	2（0，10）											405±68	425±64			86±10	86±8
85	Randomized Controlled Trial	4.805	10.5665/sleep.2948	Michiel H J Doff	2013	Holland	Patients with obstructive sleep apnea (AHI ≥7/h)	103	52	51	49±3/43±8	92	11	1Y	Oral appliance therapy and CPAP	0（0，1）	2（0，5）											433±60	433±63			89±8	88±7
86	Randomized Controlled Trial	4.805	10.5665/sleep.2948	Michiel H J Doff	2013	Holland	Patients with obstructive sleep apnea (AHI ≥8/h)	103	52	51	49±3/43±8	92	11	2Y	Oral appliance therapy and CPAP	0（0，1）	2（1，8）											431±70	440±62			86±10	89±8
87	Randomized Controlled Trial	4.732	10.1016/j.psyneuen.2009.07.007	Michael Kluge	2009	Germany	Healthy subjects	10	10	10	64.0±2.2	10	0	9D	Oral appliance therapy and CPAP																	77.2±4.4	81.0±2.1	451.6±6.3	455.8±8.4
88	Randomized Controlled Trial	4.732	10.1016/j.psyneuen.2009.07.007	Michael Kluge	2009	Germany	Healthy subjects	10	10	10	63.0±2.9	0	10	9D	50μg acetylated ghrelin and placebo																	87.7±1.3	86.1±2.3	450.8±5.5	454.7±2.7
89	Randomized Controlled Trial	4.732	10.1016/j.psyneuen.2008.01.008	Michael Kluge	2008	Germany	Healthy subjects	10	10	10	25.7±3.0	10	0	9D	50μg acetylated ghrelin and placebo																	92.9 ±1.9	93.4 ±1.2	470.6 ±3.3	470.1 ±4.3
90	Randomized Controlled Trial	4.732	10.1016/j.psyneuen.2008.01.008	Michael Kluge	2008	Germany	Healthy subjects	10	10	10	25.7±3.0	10	0	9D	50μg acetylated ghrelin +50 μg GHRH and placebo																	92.9 ±1.9	94.2 ±1.0	470.6 ±3.3	466.3 ±4.1
91	Randomized Controlled Trial	4.732	10.1016/j.psyneuen.2008.01.008	Michael Kluge	2008	Germany	Healthy subjects	10	10	10	25.7±3.0	10	0	9D	50μg acetylated ghrelin +50 μg CRH and placebo																	92.9 ±1.9	95.3 ±0.7	470.6 ±3.3	474.4 ±2.8
92	Clinical Trial	8.308	10.1378/chest.121.3.739	Marie-Louise Walker-Engström	2002	Sweden	Males with obstructive sleep apnea (Apnea index 5-25)	32	32	32		32		4Y	Dental equipment treatment	17.9±2.9	7.2±2.6
93	Clinical Trial	8.308	10.1378/chest.121.3.739	Marie-Louise Walker-Engström	2002	Sweden	Males with obstructive sleep apnea (Apnea index 5-25)	40	40	40		40		4Y	Oropharyngoplasty (UPPP)	19.9±3.0	14.2±3.4
94	Clinical Trial	8.308	10.1378/chest.125.4.1270	Marie Marklund	2005	Sweden	Patients with obstructive sleep apnea	630	630	630		508	122	1Y	Monolithic rigid tube propulsion unit	21（1.1-74）	7.6（0.0-72）											400（240-760）	385（98-660）
95	Clinical Trial	4.805	10.1093/sleep/zsy195	Shahrokh	2018	America	Patient with left ventricular ejection fraction <40%	41			66(9)	39	2									4 (2)	4 (1)	25 (3)	21 (3)
96	Clinical Trial	4.805	10.1093/sleep/zsy195	Shahrokh	2018	America	Left ventricular ejection fraction <40%	41			66(9)	39	2									4 (2)	2 (1)	25 (3)	22 (3)
97	Clinical Trial	4.805	10.1093/sleep/zsy195	Shahrokh	2018	America	Left ventricular ejection fraction <40%	41			66(9)	39	2									4 (2)	3 (1)	25 (3)	25 (3)
98	Clinical Trial	4.805	10.1093/sleep/zsy195	Shahrokh	2018	America	Left ventricular ejection fraction <40%	41			66(9)	39	2									4 (2)	2 (1)	25 (3)	26 (3)
99	Clinical Trial	4.805	10.1093/sleep/zsy195	Shahrokh	2018	America	Left ventricular ejection fraction <40%	41			66(9)	39	2									4 (2)	4 (1)	25 (3)	34 (4)
100	Clinical Trial	4.805	10.1093/sleep/zsy195	Shahrokh	2018	America	Left ventricular ejection fraction <40%	41			66(9)	39	2									4 (2)	4 (1)	25 (3)	35 (3)
101	Clinical Trial	4.805	10.1093/sleep/zsy195	Shahrokh	2018	America	Left ventricular ejection fraction <40%	41			66(9)	39	2									4 (2)	4 (1)	25 (3)	37 (4)
102	RCT（A Randomized, Placebo-controlled, Double-Blind Crossover Trial)	17.452	10.1164/rccm.201808-1493OC	Luigi	2019		Patients with obstructive sleep apnea	40	20	20	53(46,58)			2d	1 night 80mg tomoxetine plus 5mg oxbutyning (ATO-oxY)	28.5(10.9, 51.6)	7.5(2.4,18.6)			35.6 (12.8,55.0)	16.5 (8.3,29.1)							257 (172,304)	287 (240,317)			67(45,86)	71 (63, 84)									20 (12, 52)	30 (20, 37)	32 (16,40)	36 (26, 46)	5 (0, 17)	0 (0,13)
103	RCT（randomized, placebo-controlled crossover trial）	5.032	10.1001/jamanetworkopen.2020.7940	Lu	2020	Switzerland	32 lowland residents with chronic obstructive pulmonary disease	64	32	32	65.6(5.6)	15	17	2d	Altitude 2048 m, night oxygen therapy (NOT) or placebo (indoor air) at 3 L/min via nasal cannula	36.1 (27.9)	14.3(16.9)			9.3 (11.2)	9.0 (10.9)	26.8 (23.9)	5.3 (11.4)					349 (76)	386 (71)			19.6 (16.0)	20.6 (15.2)			486(25)	484(49)					33.0 (21.2)	25.5 (18.4)	42.0 (16.8)	45.6 (13.2)	13.2 (10.1)	13.8 (8.9)
104	RCT（randomized, placebo-controlled crossover trial）	5.032	10.1001/jamanetworkopen.2020.7940	Lu	2020	Switzerland	32 lowland residents with chronic obstructive pulmonary disease	64	32	32	65.6(5.6)	15	17	2d	Altitude 2048 m, night oxygen therapy (NOT) or placebo (indoor air) at 3 L/min via nasal cannula	27.3 (22.6)	10.4 (10.4)			7.6 (8.8)	5.5(6.9)	19.7 (19.5)	4.8 (7.4)													476(60)	492(25)
105	Clinical Trial	7.067	10.1097/ALN.0000000000003567	Shubham	2020			15						1 year	Oral dexmedetomidine													523(40)	544(33)			87(7)	91(5)									5(3)	5(4)	49(6)	60(11)	24(6)	20(6)
106	Clinical Trial	4.805	10.1093/sleep/13.1.31	M H Bonnet	1990		Patients with central sleep apnea	5			(65,74)			Subjects slept for 4 nights on each of 3 nonconsecutive laboratory weeks	0.125 mg triazolam	20.9	13.5					3.1	1.5	16.3	9.4			370	423	6.5	7.9					452	454	18	10			13	10	49	62			2.8	1.4
107	Clinical Trial	4.805	10.1093/sleep/13.1.31	M H Bonnet	1990		Patients with central sleep apnea	5			(65,74)			Subjects slept for 4 nights on each of 3 nonconsecutive laboratory weeks	0.25 mg triazolam	20.9	11					3.1	1.9	16.3	8			370	421	6.5	7.5					452	475	18	10			13	9	49	60			2.8	2.5
108	Clinical Trial	4.805	10.1093/sleep/13.1.24	O Lapierre	1990			12			(23,63)	6	6		A placebo													440.2 (5.7)	432.8 (8.3)													10.1 (1.3)	8.1 (0.8)	59.1 (2.4)	60.5 (1.9)
109	Clinical Trial	4.805	10.1093/sleep/13.1.24	O Lapierre	1990			12			(23,63)	6	6		Gamma-hydroxybutyrate (GHB)													87.5 （7.6）	106.0 （10.5）													19.1（2.5）	8.6 （2.4）	62.6 (4.2)	39.8 (7.5)
110	Clinical Trial	4.805	10.1093/sleep/15.1.64	M G Terzano	1992			18			49.6(5.1)				A placebo													402 （37.9）	420 （49.7）
111	Clinical Trial	4.805	10.1093/sleep/15.1.64	M G Terzano	1992			18			49.6(5.1)				Imidazopyridine hypnotic agent (zolpidem) 10 mg													462（21.2）	465（25.2）
112	Clinical Trial	4.805	10.1093/sleep/18.8.644	M E Camacho	1995	America	Insomnia patients and control group	7	7	7	65(3.8)				Seven subjects received temazepam 15-30 mg/day either alone or in combination with behavior therapy					8.8 (5.3)	6.0 (3.6)							346 (28)	365 (36)			79(10)	87(8)
113	Clinical Trial	4.805	10.1093/sleep/18.8.644	M E Camacho	1995	America	Insomnia patients and control group	8	8	8	65(3.8)				Eight subjects received placebo or behavior therapy					9.2(2.7)	7.6(4.7)							377(48)	380(43)
114	Clinical Trial	4.805	10.1093/sleep/17.2.132	L Trachsel	1994	Germany	Male volunteers	17	17	17	(21, 30)	17			Endotoxin, a lipopolysaccharide (0.4 or 0.8 ng/kg body weight)													470.2 (11.3)	492.0 (13.1)			92.2 (1.7)	93.9 (1.0)	470.2 (11.3)	492.0 (13.1)	506.1 (10.5)	528.6 (11.6)			15.7 (2.6)	11.6(1.4)
115	Clinical Trial	12.095	10.1016/s0006-3223(97)80252-1	T Bhatti	1998		Eleven healthy male subjects	11	11	11	37.4 (3.73)	11	0		Tryptophan free amino acid beverage (TFD), 25%TFD													389.3 (6.9)	405.7 (6.8)			92.2 (6.1)	91.8 (6.1)									7.0 (6.1)	6.0 (6.1)	62.0 (6.2)	59.1 (6.2)	4.9 (6.1)	5.7 (6.1)	2.7 (6.1)	2.2 (6.1)
116	Clinical Trial	12.095	10.1016/s0006-3223(97)80252-1	T Bhatti	1998		Eleven healthy male subjects	11	11	11	37.4 (3.73)	11	0		Tryptophan Free amino Acid beverage (TFD), 100%TFD													389.3 (6.9)	372.4 (6.7)			92.2 (6.1)	87.5 (6.2)									7.0 (6.1)	6.8 (6.1)	62.0 (6.2)	57.7 (6.2)	4.9 (6.1)	6.0 (6.1)	2.7 (6.1)	2.3 (6.1)
117	Clinical Trial	17.452	10.1164/ajrccm.156.1.9608037	R B Berry	1997	America	Six male patients with severe obstructive sleep apnea (OSA)	6			50.8 (7.0)	6	0		lidocaine	86.4 (9.4)	89.3 (7.8)
118	Clinical Trial	12.095	10.1016/S0006-3223(96)00183-7	R E Poland	1997		The control group	18	18	18	38.0 (3.0)	5	13	2d	Scopolamine (SCOP) (4.5 μg/kg)													442.0 ( 8.3)	437.6 (11.8)			0.94 (0.02)	0.93 (0.02)									7.9 (1.4)	11.7 (3.l)	47.5 (3.5)	58.4 (3.1)	14.1 (2.1)	11.9 ( 1.5)	8.6 (1.4)	10.8 (1.7)
119	Clinical Trial	12.095	10.1016/S0006-3223(96)00183-7	R E Poland	1997		People with major depressive episodes	14	14	14	42.6 (3.1)	3	11	2d	Scopolamine (SCOP) (4.5 μg/kg)													421.0 (14.1)	425.0 (12.0)			0.91 (0.02)	0.90 (0.02)									10.0 (1.5)	17.0 (2.7)	46.6 (2.8 )	49.5 (3.0)	16.5 (1.6)	14.9 (1.5)	9.3 (1.6)	10.1 ( 2.2)
120	Clinical Trial	12.095	10.1016/S0006-3223(96)00183-7	R E Poland	1997		Subjects recovering from a major depressive episode (MDE)	16	16	16	39.7 (3.3)	5	11	2d	Scopolamine (SCOP) (4.5 μg/kg)													405.3 (11.9)	397.7 (17.3)			0.87 (0.02)	0.84 (0.04)									9.8 (2.5)	12.6 (4.1)	48.1 (2.9)	52.6 (3.2)	9.5 (1.3)	10.5 (1.2)	11.2 (1.6)	14.5 (2.1)
121	Clinical Trial	8.308	10.1378/chest.111.1.163	K A Franklin	1997	Sweden	Twenty patients with central apnea	20			68.5 (38, 80)	20	0		oxygen													417 (247, 508)	409 (211, 503)			80.6 (48.8, 97.0)	73.4 (41.8, 93.0)									36.1 (4.8, 742)	31.1 (27, 61.1)	49.3 (20 9, 70.4)	52.4 (31.9, 81.6)
122	Clinical Trial	12.095	10.1016/0006-3223(95)00656-7	D P Brunner	1996	Switzerland	People with seasonal affective disorder	11	11	11	46.5 (12.9)	0	11	6 months	A baseline (BL) sleep episode and ending with recovery sleep (REC),before five days of bright light treatment (LT)											54.1 (12.1)	41.7 (14.5)	427.3 (13.5)	444.5(11.4)			83.7 (2.1)	87.5(2.6)			510.8(10.4)	510.1 (10.9)
123	Clinical Trial	12.095	10.1016/0006-3223(95)00656-7	D P Brunner	1996	Switzerland	People with seasonal affective disorder	11	11	11	46.5 (12.9)	0	11	6 months	A baseline (BL) sleep episode and ending with recovery sleep (REC),after five days of bright light treatment (LT)											15.3 (5.2)	10.5 (4)	476.9 (9.7)	485.5 (10.4)			93.5 (0.9)	95.2 (0.8)			509.9 (9.7)	509.9 (10)
124	Clinical Trial	12.095	10.1016/0006-3223(95)00656-7	D P Brunner	1996	Switzerland	Female control group	8	8	8	50.4 (12.5)	0	8	6 months	A baseline (BL) sleep episode and ending with recovery sleep (REC),before five days of bright light treatment (LT)											100.8 (27.9)	82.9 (18.2)	336.3 (34)	376 (24.1)			68.7 (6.7)	77.2 (4.4)			488.1 (9.1)	485.7 (9.4)
125	Clinical Trial	12.095	10.1016/0006-3223(95)00656-7	D P Brunner	1996	Switzerland	Female control group	8	8	8	50.4 (12.5)	0	8	6 months	A baseline (BL) sleep episode and ending with recovery sleep (REC),after five days of bright light treatment (LT)											33.1 (13)	15.7 (4.2)	437.9 (12.4)	457 (10.8)			90.2 (2.5)	94.3 (1)			485.8 (9.4)	484.3 (9.4)
126	Clinical Trial	4.805	10.1093/sleep/19.6.497	S Sharma	1996	Canada	People with obstructive sleep apnea	20	20	20					Manually adjust CPAP (continuous positive airway pressure)	50.8 (28.8 )	3.8 (3.1)											363.2 (61.6)	361.7 (70.1)													9.7 (8.1)	6.2 (5.8)	63.6 (10.8)	55 (13.1)	9.1 (8.5)	16.7 (9.8)
127	Clinical Trial	4.805	10.1093/sleep/19.6.497	S Sharma	1996	Canada	People with obstructive sleep apnea	20	20	20					Self-titration CPAP (continuous positive airway pressure)	50.8 (28.8 )	6.1 (5.3)											363.2 (61.6)	360.9 (78)													9.7 (8.1)	6.1 (4.4 )	63.6 (10.8)	50.9 (12.2)	9.1 (8.5)	l7.1 (9.3)
128	Clinical Trial	4.805	10.1093/sleep/19.6.491	M B Scharf	1996	America	People with obstructive sleep apnea	12			48.4 (12.2 )	8	4		Nasal continuous positive airway pressure (NCPAP)	0.9 (1.6)	0.5 (0.5）			3.8 (2.5)	4.4 (2.2)					8 (10)	11.7 (22.3)	392.6 (55.7)	388.3 (78.5)			82.7 (10.7)	80.9 (10.1)									5.43 (2.7)	6.7 (2.9)	67.4 (6.4)	61.2 (8.8)	4.6 (6)	8.6 (7.5)
129	Clinical Trial	17.452	10.1164/ajrccm.154.3.8810613	H Teschler	1996	Germany	People with obstructive sleep apnea	20	20	20	52 (2)	20			Manual titration (CPAP)					60.3 (5.7)	10.1 (3.0)							357 (4.6)	366 (4.3)													28.6 (4.0)	14.7 (1.9)	46.9 (2.9)	25.8 (2.4)
130	Clinical Trial	17.452	10.1164/ajrccm.154.3.8810613	H Teschler	1996	Germany	People with obstructive sleep apnea	20	20	20	52 (2)	20			Automatic setting automatic titration (CPAP)					60.3 (5.7)	2.8 (0.9)							357 (4.6)	344 (5.8)													28.6 (4.0)	13.8 (1.6)	46.9 (2.9)	26.0 (2.3)
131	Clinical Trial	17.452	10.1164/ajrccm.154.3.8810613	H Teschler	1996	Germany	People with obstructive sleep apnea	20	20	20	52 (2)	20			Automatic titration combination therapy with manual titration and automatic setting (CPAP)					10.1 (3.0)	2.8 (0.9)							366 (4.3)	344 (5.8)													14.7 (1.9)	13.8 (1.6)	25.8 (2.4)	26.0 (2.3)
132	Clinical Trial	8.308	10.1378/chest.109.6.1477	G T Clark	1996	Israel	People with obstructive sleep apnea	23			(21, 75)	23		2 y	Continuous positive airway pressure (CPAP)	33.86 (14.30)	11.5 (3.93)													6.26 (0.80)	6.14 (0.85)	87.10 (10.67)	89.52 (7.27)			6.61 (0.49)	6.:30 (0.7)
133	Clinical Trial	8.77	10.1212/wnl.54.8.1633	L Parrino	2000	Italy	People with obstructive sleep apnea	10	10	10	47.4 (5.3)	8	2		Nasal continuous positive airway pressure (NCPAP)											36 (20)	23 (21)	443 (28)	456 (28)			89 (5)	91 (5)
134	Clinical Trial	4.34	10.1055/s-2000-7972	F Donath	2000	America	Patients with insomnia	16			(22, 56)	12	4		A placebo																	87.5 (82.5, 90.9)	85.2 (80.3, 90.5)	443.0 (430.1, 459.4)	450.5 (437.3, 458.0)							8.6 (6.5, 11.1)	9.4 (6.8, 13.7)	51.4 (44.1, 55.1)	48.6 (45.8, 54.3)
135	Clinical Trial	4.34	10.1055/s-2000-7972	F Donath	2000	America	Patients with insomnia	16			(22, 56)	12	4		A daily dose of 600 mg valerian root extract.																	88.4 (80.7, 93.1)	89.6 (79.7, 93.5)	457.3 (437.4, 468.6)	457.8 (430.5, 467.9)							7.6 (5.8, 9.4)	7.8 (5.8, 10.7)	49.6 (46.1, 54.8)	49.2 (44.2, 53.6)
136	Clinical Trial	4.805	10.1093/sleep/22.8.1087	R B Berry	1999	America	People with obstructive sleep apnea	8			48.0 (1.9)	8	0		paroxetine	73.7 (6.9)	75.2 (5.5)											297.8 (20.9)	314.0 (10.7)					366.8 (20.4)	379.3 (10.7)							25.9 (9.1)	28.8 (10.2)	43.6(15.4)	45.3 (16.0)	5.7 (2.0)	5.6 (2.0)	6.2 (2.2)	3.2 (1.1)
137	Clinical Trial	8.308	10.1378/chest.116.6.1545	J S Loredo	1999	America	People with obstructive sleep apnea	41	18	24	(30, 65)	33	8	1D	Continuous positive airway pressure (CPAP)					26.1 (19.5)	5.1 (5.6)					36.9 (26.2)	26.0 (22.9)	318.6 (60.4)	336.2 (50.8)			87.9 (6.1)	88.3 (9.4)
138	Clinical Trial	8.308	10.1378/chest.116.6.1545	J S Loredo	1999	America	People with obstructive sleep apnea	41	18	24	(30, 65)	33	8	7D	Continuous positive airway pressure (CPAP)					28.3 (22.7)	3.3(3.8)					43.0 (41.1)	32.0 (18.2)	307.4 (83.0)	334.0 (42.6)			83.7 (12.9)	88.1 (8.6)
139	Clinical Trial	4.805	10.1093/sleep/22.4.507	C Planès	1999	France	People with obstructive sleep apnea	26								53 (8)	48 (8)											362 (19)	426 (11)
140	Clinical Trial	4.805	10.1093/sleep/21.6.609	K Nykamp	1998		Healthy subjects	26	13	13		14	12	5 d	REM sleep deprivation																	94 (3)	93 (3)
141	Clinical Trial	17.452	10.1164/ajrccm.164.8.2008146	N McArdle	2001	Britain	People with sleep apnea hypopnea syndrome	23			53 (11)	23	20	3	Continuous positive airway pressure (CPAP)																	77 (69, 81)	80 (69, 85)
142	Clinical Trial	12.095	10.1016/s0006-3223(01)01172-6	H Gann	2001	Germany	Patients with primary alcoholism	70	40	30	44(9)	49	21																			89.31 (6.74)	84.20 (8.21)									7.37 (4.27)	11.16 (4.31)	58.69 (6.92)	54.11 (5.85)			22.40 (5.00)	23.28 (5.85)
143	Clinical Trial	4.34	10.1055/s-2001-15876	B J Murray	2001	America	Healthy subjects	10			35.9 (18, 48)	3	7		Ginkgo biloba extract											26.6 (23.6)	29.9 (25)	442 (64.3)	441.4 (60.9)			90.1 (6.5)	89.1 (5.8)
144	Clinical Trial	8.308	10.1378/chest.119.6.1807	R Heinzer	2001	Canada	People with sleep apnea	10			42.7 (1.87)	10	0		Continuous positive airway pressure (CPAP)	54.65 (7.18)	1.68 (0.81)											426 (11.8)	420 (12.0)			88.68 (1.58)	91.22 (0.92)
145	Clinical Trial	8.308	10.1378/chest.119.6.1807	R Heinzer	2001	Canada	People with sleep apnea	20			43.9 (2.2)	20	0			0.66 (0.33)	54.65 (7.18)											465 (9.7)	426 (11.8)			90.3 (1.43)	88.68 (1.58)
146	Clinical Trial	17.452	10.1164/ajrccm.163.6.2004213	A Mehta	2001	Australia	Patients with obstructive sleep apnea	24			48 (9)	19	5		Anterior mandibular splint	30 (2)	14 (2)											372 (5)	363 (5)			87 (1)	85 (1)
147	Clinical Trial	17.452	10.1164/ajrccm.163.4.9910025	K G Henke	2001	America	Patients with sleep apnea hypopnea syndrome	45	27	18	50.2 (10.4)	25	20	4 y	Continuous positive airway pressure (CPAP)	62.1 (27.4)	68.1 (25.2)											6.1 (1.3)	6.5 (1.2)			87.6 (7.9)	87.9 (12.7)
148	Clinical Trial	17.452	10.1164/ajrccm.162.1.9908112	K E Bloch	2000	Switzerland	People with sleep apnea	24			50.6 (1.5)	24	0	156 (14) d	Orthodontic apparatus	22.6 (3.1)	8.7 (1.5)											392 (10)	390 (8)			89 (2)	89 (1)
149	Clinical Trial	17.452	10.1164/ajrccm.162.1.9908023	F Sériès	2000	Canada	Patients with obstructive sleep apnea	42			(37, 66)			2 w	Continuous positive airway pressure (CPAP)	46.1 (26.3)	4.8 6 (0.2)
150	Clinical Trial	4.34	10.1055/s-2007-1014347	R E Poland	1993	America	Hospital outpatients	19			45.2 (2.6)	8	11		Low dose dexamethasone													371.2 (16.2)	374.9 (8.8)
151	Clinical Trial	4.34	10.1055/s-2007-979289	K Dujardin	1998	America	Twelve male patients with insomnia	12	12	12	(40, 62)	12	0	3 w	zolpidem													372.2 (65.0)	400.7 (71.9)			77.7 (13.6)	83.7 (15.0)
152	Clinical Trial	4.34	10.1055/s-2007-979289	K Dujardin	1998	America	Twelve male patients with insomnia	12	12	12	(40, 62)	12	0	3 w	flunitrazepam													372.2 (65.0)	418.3 (37.1)			77.7 (13.6)	87.3 (7.4)
153	Clinical Trial	8.308	10.1378/chest.113.3.714	M Konermann	1998	Germany	Patients with obstructive sleep apnea	23	23	23	53.5 (11.0)				Routine nasal continuous positive airway pressure ventilation																	89.2 (13.7)	85.2 (18.7)
154	Clinical Trial	8.308	10.1378/chest.113.3.714	M Konermann	1998	Germany	Patients with obstructive sleep apnea	25	25	25	55.4 (7.8)				Automatically adjust																	94.5 (5.4)	96.5 (2.8)
155	Clinical Trial	12.095	10.1016/0006-3223(89)90193-5	R E Poland	1989	Italy	Eight normal male volunteers	8	8	8	(19, 45)	8			Scopolamine (SCOP) (3 μg/kg)													443 (8.0)	434 (10.0)
156	Clinical Trial	12.095	10.1016/0006-3223(89)90193-5	R E Poland	1989	Italy	Eight normal male volunteers	8	8	8	(19, 45)	8			Scopolamine (SCOP) (6 μg/kg)													443 (8.0)	409 (18.0)
157	Clinical Trial	17.452	10.1164/ajrccm.157.5.9708070	R Jokic	1998	Canada	Patients with mild or moderate obstructive sleep apnea	10			49 (10)	10			lubricant	24	14											382	398			82.8	81.7
158	Clinical Trial	17.452	10.1164/ajrccm.152.2.7633695	M T Naughton	1995	Canada	Shane Stokes breathing with central sleep apnea	35	17	18	(18, 75)	35	0			6.3 ( 1.1)	42.7 ( 4.6)													4.7 (0.3)	3.8 (0.3)	78.1 (3.9)	61.2 (5.0)
159	Clinical Trial	17.452	10.1164/ajrccm.152.2.7633695	M T Naughton	1995	Canada	Shane Stokes breathing with central sleep apnea	9	9	9	(18, 75)	9	0		NCPAP(baseline)	37.3 (7.6)	48.1 (4.9)													4.0 (0.5)	3.6 (0.5)	62 (8)	62 (8)
160	Clinical Trial	17.452	10.1164/ajrccm.152.2.7633695	M T Naughton	1995	Canada	Shane Stokes breathing with central sleep apnea	9	9	9	(18, 75)	9	0		Nasal continuous positive airway pressure ventilation (1 month)	28.6 (7.2)	18.5 (6.0)													3.9 (0.3)	3.7 (0.5)	69 (5)	58 (7)
161	Clinical Trial	17.452	10.1164/ajrccm/151.4.1108	P C Deegan	1995	Ireland	Patients with obstructive sleep apnea	6	6	6	50 (5.3)	6	0		Oropharyngeal anesthesia	21.2 (3.6)	25.1 (3.5)											412.8 (18.9)	381.0 (20.2)			93.0 (2.9)	88.0 (2.9)	434.7 (8.9)	382.2 (20.4)	442.8 (9.8)	434.8 (12.3)
162	Clinical Trial	8.308	10.1378/chest.107.5.1283	H M Braver	1996	America	The snoring	19	19	19	42 (3)	19	0	6 months	Nasal spray and lateral lying													346 (9)	371 (7)					385 (6)	402 (5)
163	Clinical Trial	8.308	10.1378/chest.107.5.1283	H M Braver	1996	America	The snoring	19	19	19	42 (3)	19	0	6 months	Lose weight + nasal spray + side lying													346 (9)	347 (18)					385 (6)	393 (9)
164	Clinical Trial	12.095	10.1016/0006-3223(94)91140-1	D J Kupfer	1994	America	Patients with depression	27			38.3 (10)	5	22	3 y	Continuous antidepressant treatment													374.0 (44.6)	389.3 (53.2)			87.7 (7.4)	87.2 (7.6)
165	Clinical Trial	8.308	10.1378/chest.106.3.792	N A Collop	1994	America	Patients with obstructive sleep apnea	8	8	8	50.7 (12.6)	8	0	1 w	ethyl alcohol	9.6 (5.3)	20.2 (16.0)											346.1 (75.7)	403.7 (24.0)			83.8 (14.8)	91.0 (5.3)
166	Clinical Trial	8.308	10.1378/chest.106.3.792	N A Collop	1994	America	Alcohol induced obstructive sleep apnea	8	8	8	50.7 (12.6)	8	0	1 w	Medroxyprogesterone acetate (MPA)	12.4 (2.2)	10.0 (3.1)											386.2 (14.7)	382 (14.0)			89.3 (3.1)	90.2 (2.2)
167	Clinical Trial	17.452	10.1164/ajrccm.153.1.8542129	J T Granton	1996	Canada	Patients with heart failure and central sleep apnea	17	8	9	58.3 (2.2)				a control group receiving optimal medical therapy	35 (11)	49 (11)	10.7 (5.9)	20.2 (6.7)									234 (28)	248 (41)
168	Clinical Trial	17.452	10.1164/ajrccm.153.1.8542129	J T Granton	1996	Canada	Patients with heart failure and central sleep apnea	17	8	9	58.3 (2.2)				A NCPAP group receiving nightly NCPAP	19 (8)	17 (7)	5.4 (5.6)	6.6 (6.4)									243 (22)	229 (19)
169	Clinical Trial	17.452	10.1164/ajrccm.153.2.8564134	J C Meurice	1996	Canada	Patients with obstructive sleep apnea/hypopnea syndrome	16	16	16	54 (11)	16	0	3 w	Automatic continuous positive airway pressure ventilation	40.5 (17.7)	1.7 (1.2)													5.7 (1.2)	6.2 (1.1)
170	Clinical Trial	17.452	10.1164/ajrccm.153.2.8564134	J C Meurice	1996	Canada	Patients with obstructive sleep apnea/hypopnea syndrome	16	16	16	54 (11)	16	0	3 w	Constant continuous airway positive airway pressure ventilation	46.8 (22.3)	2.6 (3.0)													6.2 (0.9)	6.6 (1.1)
171	Clinical Trial	8.308	10.1378/chest.109.5.1269	K A Ferguson	1996	Canada	Twenty-seven symptomatic patients with mild to moderate obstructive sleep apnea	27	27	27	46.2 (10.9)	24	3	10 m	Orthodontic apparatus	19.7 (13.8)	9.7 (7.3)											400.3 (56.5)	376.7 (69.9)			88.0 (5.4)	86.5 (10.6)
172	Clinical Trial	8.308	10.1378/chest.109.5.1269	K A Ferguson	1996	Canada	Twenty-seven symptomatic patients with mild to moderate obstructive sleep apnea	27	27	27	46.2 (10.9)	24	3	10 m	Nasal continuous positive airway pressure (N-CPAP)	17.6 (13.2)	3.6 (1.7)											416.8 (60.0)	402.7 (93.6)			87.8 (7.7)	88.1 (7.3)
173	Clinical Trial	12.095	10.1016/0006-3223(92)90191-2	E Gouzoulis	1992	Germany	Healthy subjects	6	6	6	29.5(28, 33)	3	3	6 w	3, 4-methylenedioxymethamphetamine													429.6 (25.6)	207.4 (64.1)			96.6 (2.2)	57.1 (23.3)	434.8 (32.8)	382.9 (146.2)	470.0 (12.0)	470.5 (6.4)
174	Clinical Trial	12.095	10.1016/0006-3223(91)90169-m	J C Gillin	1991	America	Normal volunteers	8	8	8	31 (8)	8	0	3 m	Muscarinic antagonist epiperidine (2 mg every 30 minutes before bed)													350 (11)	336 (9)			90.0 (2.8)	88.0 (2.3)
175	Clinical Trial	12.095	10.1016/0006-3223(91)90169-m	J C Gillin	1991	America	Normal volunteers	8	8	8	31 (8)	8	0	3 m	Muscarinic antagonist epiperidine (4 mg every 30 minutes before bed)													350 (11)	353 (10)			90.0 (2.8)	89.4 (2.6)
176	Clinical Trial	12.095	10.1016/0006-3223(91)90169-m	J C Gillin	1991	America	Normal volunteers	8	8	8	31 (8)	8	0	3 m	Muscarinic antagonist epiperidine (8 mg every 30 minutes before bed)													350 (11)	340 (7)			90.0 (2.8)	87.7 (1.9)
177	Clinical Trial	8.308	10.1378/chest.100.6.1542	H G Colt	1991	France	Patients with obstructive sleep apnea	7	7	7	(31, 68)	7	0	1 w	Continuous positive airway pressure (CPAP)	73 (26)	3.2 (7)											343 (56)	385 (37)
178	Clinical Trial	8.308	10.1378/chest.100.6.1542	H G Colt	1991	France	Patients with obstructive sleep apnea	7	7	7	(31, 68)	7	0	1 w	Continuous positive airway pressure (CPAP) + intermittent addition of nitrogen	73 (26)	21 (20)											343 (56)	363 (45)
[truncated: 534 more columns]
