# Supplementary material for: Quantitative Data Integration Analysis Method for Cross-Studies: Obstructive Sleep Apnea as an Example
Source: Comput Math Methods Med. 2022 Jun 7;2022:1977446. doi: 10.1155/2022/1977446 (PMC9197656; doi:10.1155/2022/1977446)
Supplement: Supplementary Materials — The Supplementary Material for this article: Supplementary Table 1: PRISMA 2009 checklist. Supplementary Table 2: search strategies. Supplementary Table 3: research information details and indicator dataset. Supplementary Table 4: specific information of indicators and studies under different profile. Supplementary Table 5: analysis result data. [file 1977446.f1.zip › Supplementary Table4.xlsx]

## Sheet: 33 Indicators in each profile
Each profile with different indicators.
* The blue cells indicate that the profile is included in the indicator
Indicators	P1-1	P1-2	P1-3	P2-1	P2-2	P2-3	P2-4	P2-5	P2-6	P3-1	P3-3	P3-5	P3-6	P3-8	P5-2	P5-5	P5-7	P5-10	P6-3	P6-6	P6-10	P7-10
AHI
TST（min）
REM(%TST)
Sleep Efficiency (SE)
Arousal Index
Minimum SaO2 (%)
N1(%TST)
SaO2<90% duration (%TST)
N2(%TST)
Sleep Latency (min)
Apnea Index
Epworth Sleepiness Score
N3+N4(%TST)
Hypopnea Index
REM duration (min)
N3(%TST)
Oxygen Desaturation Index (ODI)
AHI-NREM
AHI-REM
Slow Wave Sleep duration (%TST)
REM latency (min)
N2(%SPT)
N1(%SPT)
The average SaO2 overnight SaO2 (%)
Respiratory Disorder Index (RDI)
Respiratory Arousal Index (/hTST)
N1+N2(%TST)
FOSQ
WASO（min）
SpO2 lowest point
NREM duration (min)
Arousal times (/h)
N4(%TST)

## Sheet: 89 Studies in each profile
Each profile with different studies.
* The blue cells indicate that the profile is included in the study
No. of study	P1-1	P1-2	P1-3	P2-1	P2-2	P2-3	P2-4	P2-5	P2-6	P3-1	P3-3	P3-5	P3-6	P3-8	P5-2	P5-5	P5-7	P5-10	P6-3	P6-6	P6-10	P7-10
Study2
Study3
Study4
Study5
Study13
Study14
Study16
Study19
Study20
Study23
Study25
Study28
Study30
Study31
Study32
Study37
Study42
Study46
Study47
Study50
Study51
Study52
Study53
Study54
Study56
Study57
Study58
Study61
Study63
Study64
Study65
Study66
Study68
Study70
Study75
Study76
Study77
Study78
Study79
Study80
Study81
Study82
Study83
Study84
Study85
Study86
Study87
Study93
Study94
Study96
Study104
Study105
Study106
Study109
Study110
Study111
Study112
Study118
Study119
Study127
Study128
Study129
Study130
Study131
Study132
Study133
Study134
Study137
Study138
Study139
Study140
Study145
Study146
Study147
Study148
Study149
Study150
Study154
Study155
Study158
Study162
Study166
Study167
Study170
Study171
Study172
Study173
Study178
Study179
