# Supplementary material for: Quantitative Data Integration Analysis Method for Cross-Studies: Obstructive Sleep Apnea as an Example
Source: Comput Math Methods Med. 2022 Jun 7;2022:1977446. doi: 10.1155/2022/1977446 (PMC9197656; doi:10.1155/2022/1977446)
Supplement: Supplementary Materials — The Supplementary Material for this article: Supplementary Table 1: PRISMA 2009 checklist. Supplementary Table 2: search strategies. Supplementary Table 3: research information details and indicator dataset. Supplementary Table 4: specific information of indicators and studies under different profile. Supplementary Table 5: analysis result data. [file 1977446.f1.zip › Supplementary Table5.xlsx]

## Sheet: Sheet1
Profile	ICRT	SIRT	Amount of indicators	Indicators for analysis	Significant indicators	Amount of all studies	Indicators	Studies for analysis	Change	P values
P1-1	0.1	0.1	33	33	22	76	AHI	48	↓	<0.05
							AHI-NREM	11	↓	<0.05
							Epworth Sleepiness Scale	15	↓	<0.05
							FOSQ	11	↑	<0.05
							N1(%SPT)	12	↓	<0.05
							N1(%TST)	25	↓	<0.05
							N2(%SPT)	12	↓	<0.05
							N3+N4(%TST)	18	↑	<0.05
							REM(%TST)	52	↑	<0.05
							REM duration (min)	12	↑	<0.05
							SaO2<90% (%TST)	20	↓	<0.05
							SpO2 lowest point	10	↑	<0.05
							WASO(min)	10	↓	<0.05
							Hypopnea Index	14	↓	<0.05
							Respiratory Arousal Index (/hTST)	10	↓	<0.05
							Respiratory Disorder Index (RDI)	10	↓	<0.05
							Apnea Index	16	↓	<0.05
							Arousal Index	30	↓	<0.05
							Slow Wave Sleep duration (%TST)	11	↑	<0.05
							Sleep Efficiency(SE)	48	↑	<0.05
							The average SaO2 overnight SaO2 (%)	9	↑	<0.05
							Minimum SaO2 (%)	31	↑	<0.05
							AHI-REM	11		*
							N1+N2(%TST)	10		*
							N2(%TST)	11		*
							N3(%TST)	13		*
							N4(%TST)	8		*
							NREM duration (min)	7		*
							REM latency (min)	12		*
							TST(min)	54		*
							Arousal times (/h)	9		*
							Sleep Latency (min)	22		*
							Oxygen Desaturation Index(ODI)	10		*
P1-2	0.1	0.2	33	33	19	59	AHI	31	↓	<0.05
							Epworth Sleepiness Scale	6	↓	<0.05
							N1(%SPT)	7	↓	<0.05
							N1(%TST)	22	↓	<0.05
							N2(%SPT)	7	↓	<0.05
							N3+N4(%TST)	10	↑	<0.05
							REM(%TST)	38	↑	<0.05
							REM duration (min)	8	↑	<0.05
							SaO2<90% (%TST)	15	↓	<0.05
							SpO2 lowest point	7	↑	<0.05
							WASO(min)	9	↓	<0.05
							Hypopnea Index	10	↓	<0.05
							Respiratory Arousal Index (/hTST)	9	↓	<0.05
							Respiratory Disorder Index (RDI)	8	↓	<0.05
							Apnea Index	14	↓	<0.05
							Arousal Index	21	↓	<0.05
							Slow Wave Sleep duration (%TST)	8	↑	<0.05
							Sleep Efficiency(SE)	35	↑	<0.05
							Minimum SaO2 (%)	24	↑	<0.05
							AHI-NREM	9		*
							FOSQ	7		*
							The average SaO2 overnight SaO2 (%)	6		*
							AHI-REM	9		*
							N1+N2(%TST)	7		*
							N2(%TST)	20		*
							N3(%TST)	13		*
							N4(%TST)	8		*
							NREM duration (min)	6		*
							REM latency (min)	8		*
							TST(min)	40		*
							Arousal times (/h)	8		*
							Sleep Latency (min)	16		*
							Oxygen Desaturation Index(ODI)	5		*
P1-3	0.1	0.3	33	20	6	22	AHI	18	↓	<0.05
							Arousal index	10	↓	<0.05
							REM duration (min)	4	↑	<0.05
							REM(%TST)	21	↑	<0.05
							AHI-NREM	5	↑	<0.05
							SaO2<90% (%TST)	6	↓	<0.05
							AHI-REM	5		*
							Arousal times (/h)	3		*
							FOSQ	3		*
							Minimum SaO2 (%)	14		*
							N1(%TST)	9		*
							N1+N2(%TST)	3		*
							N2(%TST)	9		*
							N3+N4(%TST)	10		*
							NREM duration (min)	3		*
							REM latency (min)	3		*
							Sleep Efficiency(SE)	21		*
							Sleep Latency (min)	4		*
							TST(min)	21		*
							WASO(min)	3		*
P2-1	0.2	0.1	13	13	10	84	AHI	55	↓	<0.05
							Epworth Sleepiness Scale	19	↓	<0.05
							N1(%TST)	25	↓	<0.05
							N3+N4(%TST)	18	↑	<0.05
							REM(%TST)	53	↑	<0.05
							SaO2<90% (%TST)	22	↓	<0.05
							Apnea Index	18	↓	<0.05
							Arousal Index	33	↓	<0.05
							Sleep Efficiency(SE)	48	↑	<0.05
							Minimum SaO2 (%)	32	↑	<0.05
							N2(%TST)	23		*
							Sleep Latency (min)	22		*
							TST(min)	54		*
P2-2	0.2	0.2	13	13	10	76	AHI	47	↓	<0.05
							Epworth Sleepiness Scale	18	↓	<0.05
							N1(%TST)	25	↓	<0.05
							N3+N4(%TST)	18	↑	<0.05
							REM(%TST)	53	↑	<0.05
							SaO2<90% (%TST)	21	↓	<0.05
							Apnea Index	16	↓	<0.05
							Arousal Index	31	↓	<0.05
							Sleep Efficiency(SE)	48	↑	<0.05
							Minimum SaO2 (%)	31	↑	<0.05
							N2(%TST)	23		*
							Sleep Latency (min)	22		*
							TST(min)	53		*
P2-3	0.2	0.3	13	13	10	63	AHI	41	↓	<0.05
							Epworth Sleepiness Scale	12	↓	<0.05
							N1(%TST)	25	↓	<0.05
							N3+N4(%TST)	16	↑	<0.05
							REM(%TST)	48	↑	<0.05
							SaO2<90% (%TST)	17	↓	<0.05
							Apnea Index	16	↓	<0.05
							Arousal Index	29	↓	<0.05
							Sleep Efficiency(SE)	44	↑	<0.05
							Minimum SaO2 (%)	31	↑	<0.05
							N2(%TST)	23		*
							Sleep Latency (min)	18		*
							TST(min)	48		*
P2-4	0.2	0.4	13	13	9	40	AHI	31	↓	<0.05
							Epworth Sleepiness Scale	7	↓	<0.05
							N1(%TST)	21	↓	<0.05
							N3+N4(%TST)	14	↑	<0.05
							REM(%TST)	34	↑	<0.05
							SaO2<90% (%TST)	14	↓	<0.05
							Apnea Index	11	↓	<0.05
							Arousal Index	19	↓	<0.05
							Sleep Efficiency(SE)	32	↑	<0.05
							N2(%TST)	21		*
							Sleep Latency (min)	12		*
							TST(min)	32		*
							Minimum SaO2 (%)	22		*
P2-5	0.2	0.5	13	13	7	26	AHI	18	↓	<0.05
							Epworth Sleepiness Scale	2	↓	<0.05
							Apnea Index	8	↓	<0.05
							SaO2<90% (%TST)	10	↓	<0.05
							N1(%TST)	16	↓	<0.05
							Arousal index	13	↓	<0.05
							N3+N4(%TST)	12	↑	<0.05
							REM(%TST)	22		*
							Sleep Efficiency(SE)	22		*
							Sleep Latency (min)	9		*
							N2(%TST)	16		*
							Minimum SaO2 (%)	13		*
							TST(min)	21		*
P2-6	0.2	0.6	13	12	3	11	SaO2<90% (%TST)	6	↓	<0.05
							AHI	10	↓	<0.05
							Apnea Index	4	↓	<0.05
							Minimum SaO2 (%)	3		*
							N1(%TST)	11		*
							Arousal index	9		*
							N3+N4(%TST)	5		*
							REM(%TST)	8		*
							Sleep Efficiency(SE)	11		*
							Sleep Latency (min)	5		*
							N2(%TST)	11		*
							TST(min)	10		*
P3-1	0.3	0.1	6	6	5	85	AHI	56	↓	<0.05
							Arousal Index	33	↓	<0.05
							REM(%TST)	53	↑	<0.05
							Minimum SaO2 (%)	32	↑	<0.05
							Sleep Efficiency(SE)	48	↑	<0.05
							TST(min)	54		*
P3-3	0.3	0.3	6	6	5	72	AHI	45	↓	<0.05
							Arousal Index	33	↓	<0.05
							REM(%TST)	53	↑	<0.05
							Minimum SaO2 (%)	32	↑	<0.05
							Sleep Efficiency(SE)	48	↑	<0.05
							TST(min)	53		*
P3-5	0.3	0.5	6	6	5	60	AHI	39	↓	<0.05
							Arousal Index	31	↓	<0.05
							REM(%TST)	48	↑	<0.05
							Minimum SaO2 (%)	31	↑	<0.05
							Sleep Efficiency(SE)	44	↑	<0.05
							TST(min)	47		*
P3-6	0.3	0.6	6	6	5	45	Arousal Index	26	↓	<0.05
							AHI	34	↓	<0.05
							REM(%TST)	36	↑	<0.05
							Minimum SaO2 (%)	28	↑	<0.05
							Sleep Efficiency(SE)	32	↑	<0.05
							TST(min)	40		*
P3-8	0.3	0.8	6	6	3	23	AHI	18	↓	<0.05
							Arousal index	14	↓	<0.05
							REM(%TST)	21	↑	<0.05
							Minimum SaO2 (%)	18		*
							Sleep Efficiency(SE)	20		*
							TST(min)	22		*
P5-2	0.5	0.2	4	4	3	85	AHI	56	↓	<0.05
							REM(%TST)	53	↑	<0.05
							Sleep Efficiency(SE)	48	↑	<0.05
							TST(min)	54		*
P5-5	0.5	0.5	4	4	3	69	AHI	42	↓	<0.05
							REM(%TST)	53	↑	<0.05
							Sleep Efficiency(SE)	53	↑	<0.05
							TST(min)	53		*
P5-7	0.5	0.7	4	4	3	47	AHI	36	↓	<0.05
							REM(%TST)	39	↑	<0.05
							Sleep Efficiency(SE)	37	↑	<0.05
							TST(min)	41		*
P5-10	0.5	1	4	4	2	22	AHI	17	↓	<0.05
							REM(%TST)	20	↑	<0.05
							Sleep Efficiency(SE)	20		*
							TST(min)	20		*
P6-3	0.6	0.3	3	3	2	85	AHI	56	↓	<0.05
							REM(%TST)	53	↑	<0.05
							TST(min)	54		*
P6-6	0.6	0.6	3	3	2	58	AHI	39	↓	<0.05
							REM(%TST)	47	↑	<0.05
							TST(min)	51		*
P6-10	0.6	1	3	3	2	29	AHI	24	↓	<0.05
							REM(%TST)	28	↑	<0.05
							TST(min)	27		*
P7-10	0.7	1	1	1	1	63	AHI	55	↓	<0.05
* No significance
